# Supplementary material
Source: PubMed Central journal article supplement (PMC10666001)
Supplement: NIHMS1946115-supplement-1.pdf [file NIHMS1946115-supplement-1.pdf]

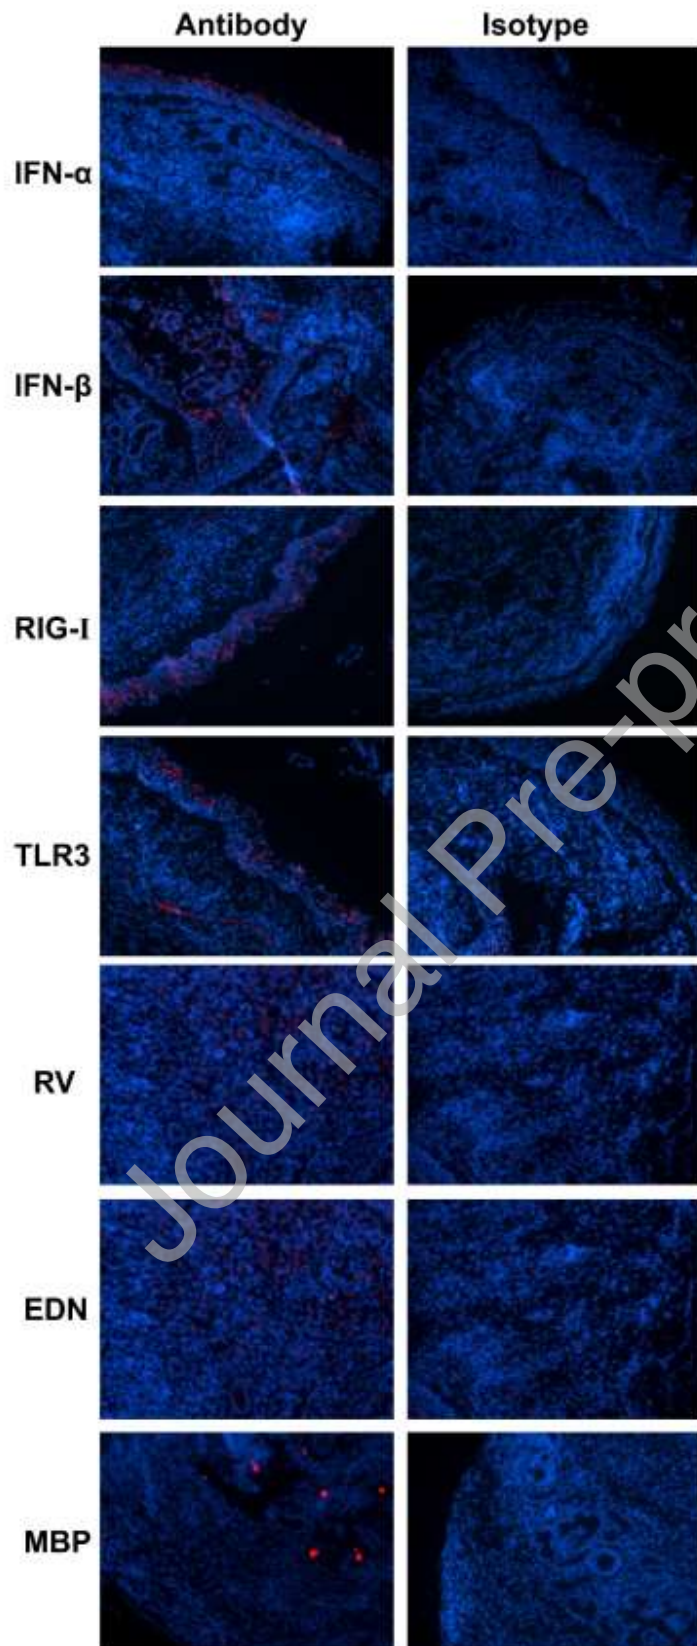

eFigure 1: Representative immunofluorescent staining for IFN- $\alpha$ , IFN- $\beta$ , RIG-I, TLR3, RV, EDN and MBP and isotype control antibodies.

Journal Pre-proof

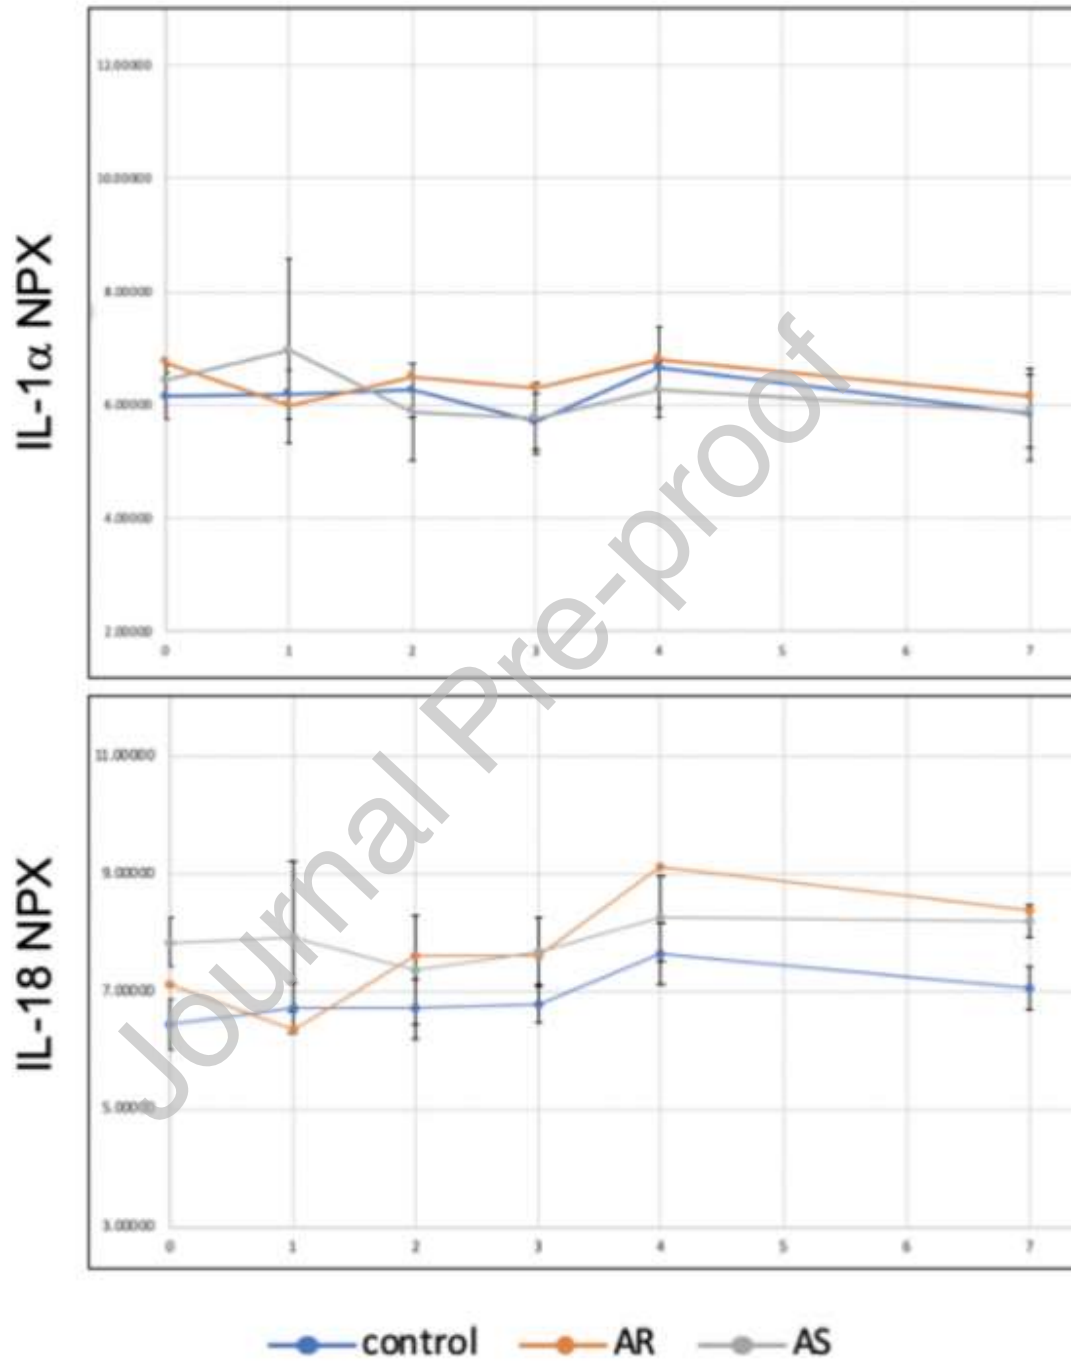

eFigure 2: Proximity extension assay data for IL-1 and IL-18. See text for details of methodology. Distribution of protein abundance levels are expressed in NPX units, representing  $\log_2$  semi-quantitative concentrations.

Journal Pre-proof
